membrane-spanning domains, ring finger binding protein (RFBP), an atypical type IV ATPase, was described to interact with RUSH, a member of the SWI/SNF family of transcription factors that remodel chromatin.

A-type-lamin-LAP2 $\alpha$  complexes interact with the retinoblastoma protein (pRb), whereas LAP2 $\beta$  binds to mouse germ cell less (mGCL), which interacts with the transcription factor E2F-associated DP. Thus, these proteins might regulate E2F

activity and cell cycle progression. A-kinase-anchoring protein AKAP149 is a protein of the endoplasmic reticulum and outer nuclear membrane (ONM), which associates also with the phosphatase PP1 and is important for post-mitotic lamin assembly.

LBR was identified as part of a huge complex that also contains the integral membrane protein p18, an LBR kinase and p32/34, a low-molecular-weight protein.

Aside from the integral membrane proteins of the lamina, POM121 and gp 210 have been identified as transmembrane components of the nuclear pore complex.

**Cell Science at a Glance on the Web**

Electronic copies of the poster insert are available in the online version of this article at [jcs.biologists.org](http://jcs.biologists.org). JPEG and PDF files (see supplemental material) can be downloaded for printing or use as slides.

## Year 2001 Travelling Fellowships

JCS offers fellowships of up to US\$4000 to graduate students and post-docs wishing to make collaborative visits to other laboratories. These are designed to cover the cost of travel and other expenses, and there is no restriction on nationality. Applicants should be working in the field of cell biology and intend to visit a laboratory in another country. Each application is judged on the excellence of the candidate, and the importance and innovative quality of the work to be done.

Application forms can be downloaded from our Web site at <http://jcs.biologists.org>. Please send the completed application form, together with a copy of your CV, an account of the work to be done and a breakdown of the costs involved, as well as letters of recommendation from the heads of the laboratory in which you currently work and the laboratory you hope to visit, to the Production Editor at the address below.

Journal of Cell Science Editorial Office,  
The Company of Biologists Limited,  
Bidder Building, 140 Cowley Road, Cambridge CB4 0DL, UK

Deadline: 31 December 2001
